# Supplementary material
Source: PubMed Central journal article supplement (PMC3370828)
Supplement: NIHMS324406-supplement-1.pdf [file NIHMS324406-supplement-1.pdf]

Supplemental Material:

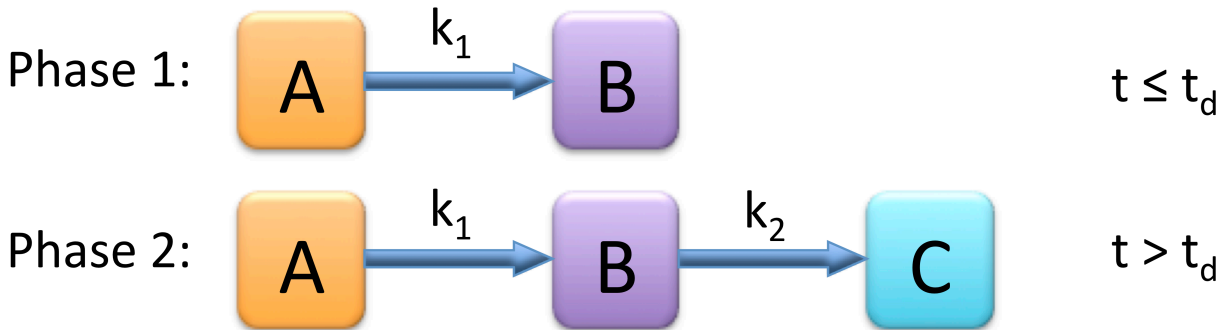

The figure above shows the three-compartment model used to simulate events after myocardial infarction. In phase 1, beginning at the onset of injury, cardiomyocytes start to transition from a healthy state (A) to a necrotic state (B) with a rate constant of  $K_1$ . In response to the necrotic material, neutrophils infiltrate the infarcted myocardium. This is followed 12-24 hours after infarction by a macrophage infiltrate, which begins to clear the necrotic debris. We define the time until the onset of the removal of necrotic debris by the macrophage infiltrate as  $t_d$ . In phase 2, beginning at  $t_d$ , necrotic cells in compartment B begin to transition to a cleared state (C). The transition of cells from a necrotic state (B) to a cleared state (C) is described by the rate constant  $K_2$ . The rate equations governing these processes are as follows:

$$\begin{cases} \frac{dA}{dt} = -k_1 A \\ \frac{dB}{dt} = k_1 A - k_2 B \end{cases}$$

We assume that, at  $t = 0$  (beginning of phase 1),  $A = A_0$ ,  $B = 0$ , and  $C = 0$ . In addition,  $k_2 = 0$ . At  $t = t_d$  (beginning of phase 2),  $A = A_0 e^{-k_1 t_d}$ ,  $B = A_0(1 - e^{-k_1 t_d})$ , and  $C = 0$ . By solving the rate equations, B can be expressed using the following equation:

$$B = \begin{cases} A_0(1 - e^{-k_1 t}) & t \leq t_d \\ \frac{k_1 A_0 e^{-k_1 t_d}}{(k_2 - k_1)} A_{t=t_d} [e^{-k_1(t-t_d)} - e^{-k_2(t-t_d)}] + A_0(1 - e^{-k_1 t_d}) e^{-k_2(t-t_d)} & t > t_d \end{cases}$$

The above equation was then used to fit the  $R_1$  values (Figure 5B) at different time points after myocardial infarction using Matlab (Mathworks, Natick, MA). We found that the rate constant  $k_1$  equaled  $0.474 \text{ hr}^{-1}$  and  $k_2$  equaled  $0.006 \text{ hr}^{-1}$ . The time delay,  $t_d$ , for macrophage infiltration equaled 18 hrs.
